# Supplementary material for: Virus-like-inspired nanoparticles facilitate bacterial internalization for enhanced eradication of drug-resistant pathogens
Source: Royal Society of Chemistry journal article supplement (doi:10.1039/d2nj01868c), 2022-01-01
Supplement: d2nj01868c1.pdf [file d2nj01868c1.pdf]

## **A Virus-like-inspired Nanoparticles Facilitates Bacterial Internalization for Enhanced Eradication of Drug-resistant Pathogen**

Yufei Zhang <sup>a</sup>, Yijie Cheng <sup>a</sup>, Yunjian Yu <sup>b</sup>, Jie Li <sup>a</sup>, Yuqing Hu <sup>a</sup>, Yingchao Gao <sup>a</sup>,  
Siyuan Huang <sup>a</sup>, Wenbo Wang <sup>a</sup>, and Xinge Zhang <sup>a\*</sup>

*<sup>a</sup> Key Laboratory of Functional Polymer Materials of Ministry Education, Institute of Polymer Chemistry, College of Chemistry, Nankai University, Tianjin 300071, China*

*<sup>b</sup> School of Chemistry and Molecular Science, Wuhan University, Wuhan 430072, China*

\* Corresponding authors:

E-mail: [zhangxinge@nankai.edu.cn](mailto:zhangxinge@nankai.edu.cn); Fax: (+86) 022-85358853

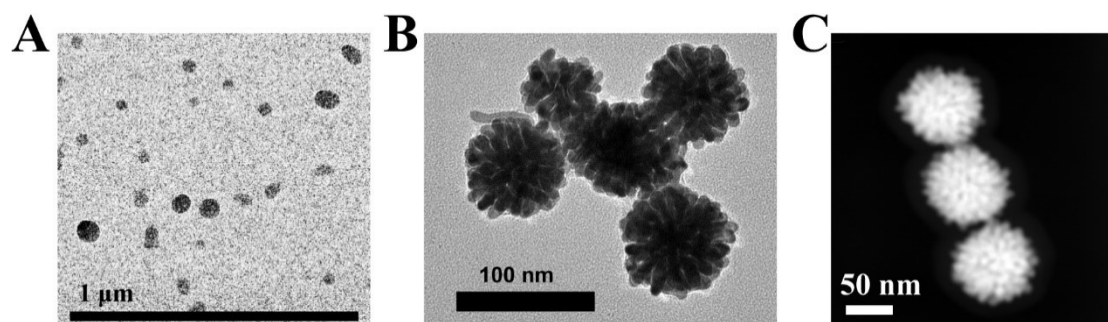

Fig. S1 TEM image of FWNPs (A) and FWANPs (B); (C) HAADF-STEM image of FWANPs.

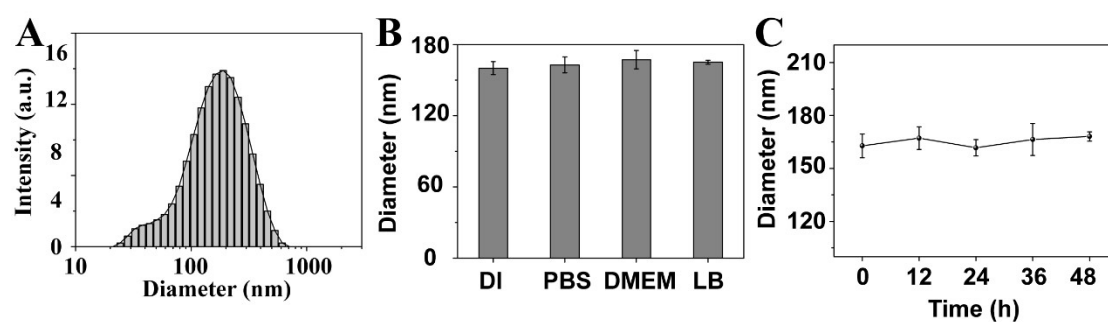

Fig. S2. (A) Size distribution of the FWAPNPs irradiated by 808 nm NIR light. (B) The stability of FWAPNPs was dispersed in various media. (C) Particle size of FWAPNPs was dispersed in PBS after incubation for 0, 12, 24, 36, and 48 h, respectively.

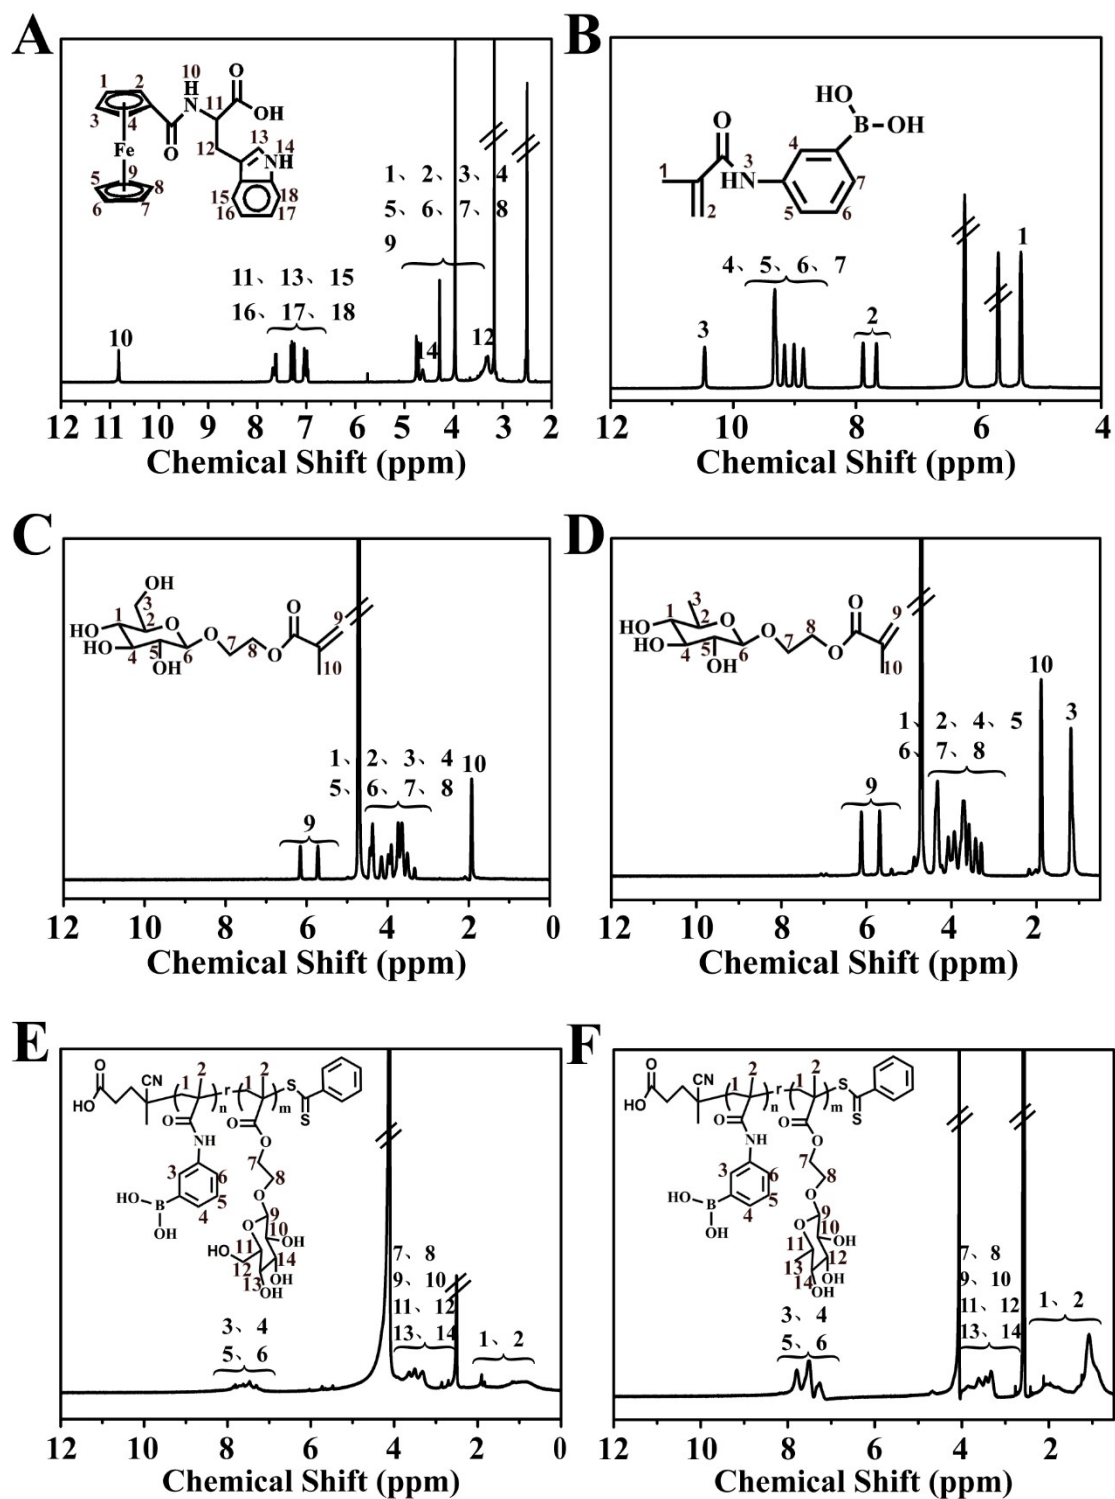

**Fig. S3**  $^1\text{H}$  NMR spectra of Fc-W (A), AAPBA (B), GEMA (C), FEMA (D), p(GEMA-*r*-AAPBA) (E), p(FEMA-*r*-AAPBA) (F).

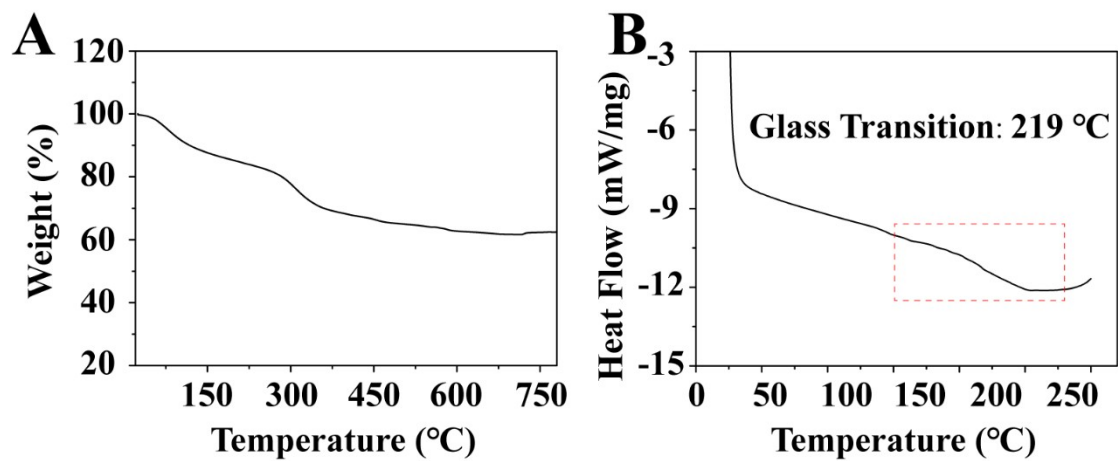

Fig. S4 (A) TGA and (B) DSC thermograms of the FWAPNPs.

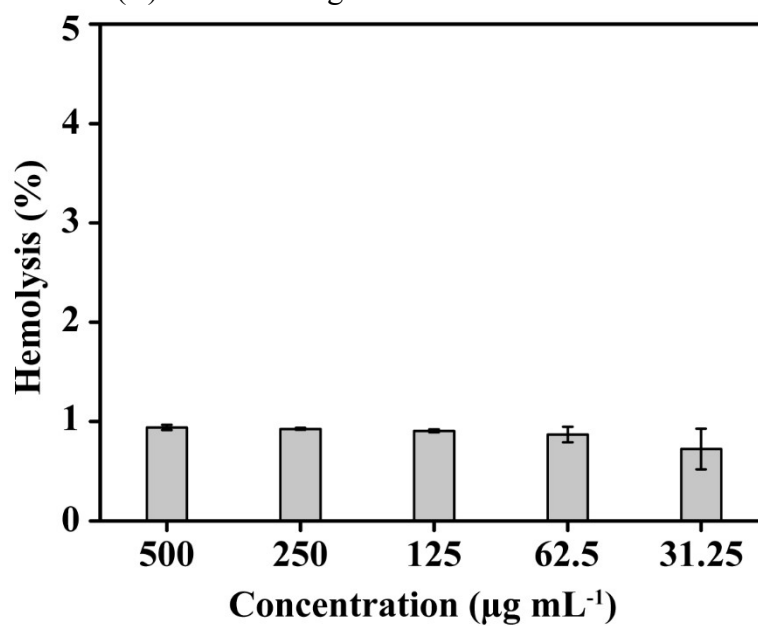

Fig. S5 Hemolysis assay of the FWAPNPs after treated with red blood cells.
